# Supplementary material for: Identification of Loci Governing Agronomic Traits and Mutation Hotspots via a GBS-Based Genome-Wide Association Study in a Soybean Mutant Diversity Pool
Source: MDPI journal article supplement (doi:10.3390/ijms231810441), 2022-09-09
Supplement: s1 [file s1]

Table S4. Filtered SNP data.

| Lines     | Total Hetero | Total Homo | SNP Ts/Tv Ratio | SNP Transition | SNP Transversion |
|-----------|--------------|------------|-----------------|----------------|------------------|
| DB-008    | 2092         | 6631       | 1.63            | 9521           | 5833             |
| DB-009    | 2489         | 7089       | 1.61            | 10275          | 6392             |
| DB-006    | 2335         | 6617       | 1.61            | 9596           | 5973             |
| DB-007    | 2230         | 5991       | 1.59            | 8721           | 5491             |
| DB-004    | 2728         | 8459       | 1.62            | 12158          | 7488             |
| DB-005    | 3103         | 8277       | 1.62            | 12147          | 7510             |
| DB-003    | 2836         | 8270       | 1.62            | 11976          | 7400             |
| KAS360-22 | 2350         | 8181       | 1.57            | 11427          | 7285             |
| HK25-165  | 1751         | 5223       | 1.66            | 7613           | 4584             |
| DB-086    | 2069         | 6392       | 1.59            | 9113           | 5740             |
| DB-087    | 1443         | 3666       | 1.63            | 5443           | 3332             |
| DP-129    | 1530         | 3345       | 1.66            | 5132           | 3088             |
| DB-085    | 1973         | 5366       | 1.68            | 7971           | 4734             |
| DP-084    | 1672         | 4052       | 1.69            | 6138           | 3638             |
| DB-083    | 7            | 45         | 2.03            | 65             | 32               |
| DB-080    | 2955         | 7102       | 1.61            | 10576          | 6583             |
| DP-080    | 2477         | 7351       | 1.6             | 10572          | 6607             |
| HK-4      | 6380         | 4364       | 1.62            | 9335           | 5773             |
| HK-5      | 4935         | 6279       | 1.58            | 10725          | 6768             |
| DP-121    | 1131         | 2923       | 1.7             | 4391           | 2586             |
| DP-120    | 2306         | 7065       | 1.62            | 10173          | 6263             |
| DP-127    | 1870         | 3881       | 1.66            | 6012           | 3620             |
| HK-1      | 2303         | 7731       | 1.58            | 10887          | 6878             |
| DB-088    | 1230         | 2772       | 1.68            | 4245           | 2529             |
| DB-089    | 1246         | 3288       | 1.68            | 4908           | 2914             |
| DP-009    | 1992         | 5052       | 1.66            | 7550           | 4546             |
| PalDal    | 2069         | 7036       | 1.64            | 10031          | 6110             |
| HK-18     | 2162         | 6728       | 1.63            | 9670           | 5948             |
| HK-19     | 2239         | 7141       | 1.59            | 10141          | 6380             |
| HK-17     | 2427         | 8124       | 1.59            | 11473          | 7202             |
| HK-14     | 2358         | 7884       | 1.58            | 11092          | 7034             |
| HK-15     | 8556         | 4971       | 1.57            | 11288          | 7210             |
| HK-12     | 2169         | 7053       | 1.59            | 10003          | 6272             |
| DP-190    | 6420         | 5136       | 1.6             | 10261          | 6431             |
| HK-10     | 3355         | 6171       | 1.59            | 9646           | 6051             |
| HK-11     | 2374         | 7848       | 1.57            | 11048          | 7022             |
| DB-019    | 2464         | 7474       | 1.61            | 10751          | 6661             |

|        |      |      |      |       |      |
|--------|------|------|------|-------|------|
| DP-081 | 2559 | 7424 | 1.61 | 10736 | 6671 |
| DP-062 | 3963 | 6624 | 1.65 | 10719 | 6492 |
| DP-060 | 2585 | 7235 | 1.6  | 10507 | 6548 |
| DP-061 | 2534 | 7419 | 1.62 | 10753 | 6619 |
| DB-010 | 2227 | 6293 | 1.6  | 9121  | 5692 |
| JS-D01 | 2394 | 8553 | 1.54 | 11823 | 7677 |
| JS-D02 | 2460 | 8649 | 1.56 | 12041 | 7717 |
| DP-093 | 5300 | 6187 | 1.6  | 10886 | 6788 |
| DP-092 | 2753 | 7840 | 1.59 | 11323 | 7110 |
| DP-097 | 1991 | 4993 | 1.65 | 7461  | 4516 |
| DP-095 | 3020 | 7838 | 1.6  | 11507 | 7189 |
| DP-094 | 2362 | 5160 | 1.64 | 7886  | 4796 |
| DB-091 | 1347 | 3384 | 1.75 | 5168  | 2947 |
| DB-090 | 2250 | 6607 | 1.62 | 9570  | 5894 |
| DB-093 | 990  | 2264 | 1.78 | 3534  | 1984 |
| BS-25  | 2478 | 8939 | 1.58 | 12456 | 7900 |
| HK-3   | 1743 | 5388 | 1.65 | 7786  | 4733 |
| DB-092 | 2169 | 5977 | 1.67 | 8830  | 5293 |
| DP-152 | 2442 | 7523 | 1.62 | 10807 | 6681 |
| DP-091 | 1884 | 5509 | 1.61 | 7963  | 4939 |
| PD-I06 | 2558 | 8720 | 1.61 | 12347 | 7651 |
| PD-I07 | 2541 | 7050 | 1.62 | 10293 | 6348 |
| PD-I04 | 2539 | 8841 | 1.61 | 12469 | 7752 |
| PD-I05 | 2239 | 7309 | 1.59 | 10360 | 6497 |
| PD-I02 | 2186 | 6145 | 1.65 | 9005  | 5471 |
| PD-I03 | 2514 | 8874 | 1.59 | 12436 | 7826 |
| PD-I01 | 2363 | 7478 | 1.61 | 10679 | 6640 |
| JS-S   | 2490 | 8770 | 1.55 | 12190 | 7840 |
| DP-012 | 1820 | 4686 | 1.69 | 7030  | 4162 |
| DP-079 | 2512 | 6980 | 1.61 | 10169 | 6303 |
| DB-024 | 1692 | 4484 | 1.68 | 6678  | 3982 |
| DB-026 | 1835 | 5220 | 1.66 | 7653  | 4622 |
| DB-027 | 2283 | 6978 | 1.6  | 9990  | 6249 |
| DB-029 | 2098 | 6549 | 1.6  | 9353  | 5843 |
| DP-090 | 2077 | 6071 | 1.65 | 8862  | 5357 |
| DB-078 | 2602 | 7151 | 1.62 | 10462 | 6442 |
| DB-033 | 1779 | 5010 | 1.68 | 7389  | 4410 |
| DP-140 | 2192 | 6113 | 1.62 | 8913  | 5505 |
| HK-46  | 2220 | 7230 | 1.6  | 10265 | 6415 |
| DP-200 | 2229 | 6632 | 1.62 | 9577  | 5916 |
| HK-40  | 2093 | 6494 | 1.61 | 9303  | 5778 |

|              |      |      |      |       |      |
|--------------|------|------|------|-------|------|
| DB-037       | 1573 | 4042 | 1.69 | 6066  | 3591 |
| DB-036       | 2141 | 6254 | 1.65 | 9111  | 5538 |
| DB-035       | 1126 | 2697 | 1.69 | 4094  | 2426 |
| DB-034       | 2104 | 7108 | 1.6  | 10055 | 6265 |
| DP-048       | 1457 | 3804 | 1.63 | 5619  | 3446 |
| HK-43        | 1280 | 3896 | 1.69 | 5694  | 3378 |
| DB-031       | 2510 | 7859 | 1.61 | 11238 | 6990 |
| DB-030       | 2401 | 7731 | 1.58 | 10951 | 6912 |
| DP-046       | 2225 | 6516 | 1.66 | 9528  | 5729 |
| DB-039       | 1794 | 5106 | 1.66 | 7500  | 4506 |
| DB-038       | 1559 | 4583 | 1.71 | 6761  | 3964 |
| DP-083       | 2402 | 7174 | 1.62 | 10349 | 6401 |
| BangSa       | 2460 | 7823 | 1.64 | 11241 | 6865 |
| HwangKeum    | 1168 | 3061 | 1.72 | 4613  | 2677 |
| HK-8         | 7052 | 5370 | 1.59 | 10931 | 6861 |
| PD-I08-W     | 2304 | 8093 | 1.6  | 11392 | 7098 |
| DP-085       | 3414 | 6675 | 1.62 | 10371 | 6393 |
| DP-172       | 1727 | 3911 | 1.6  | 5879  | 3670 |
| JoseangSeori | 1560 | 3910 | 1.72 | 5936  | 3444 |
| DP-086       | 2097 | 6074 | 1.61 | 8784  | 5461 |
| DP-178       | 3566 | 5065 | 1.65 | 8537  | 5159 |
| DP-179       | 2651 | 7204 | 1.61 | 10511 | 6548 |
| DP-087       | 9175 | 3636 | 1.62 | 10174 | 6273 |
| DanBaek      | 2568 | 7935 | 1.66 | 11499 | 6939 |
| BS-84        | 2460 | 9021 | 1.59 | 12590 | 7912 |
| HK-6         | 2399 | 7862 | 1.59 | 11137 | 6986 |
| DP-053       | 2526 | 7753 | 1.63 | 11167 | 6865 |
| DP-052       | 2457 | 7729 | 1.65 | 11149 | 6766 |
| DP-051       | 2476 | 7525 | 1.62 | 10838 | 6688 |
| DP-057       | 2582 | 7603 | 1.62 | 11005 | 6783 |
| DP-056       | 2511 | 7380 | 1.62 | 10668 | 6603 |
| DP-055       | 2520 | 7375 | 1.63 | 10705 | 6565 |
| DP-054       | 3357 | 5821 | 1.6  | 9221  | 5778 |
| DP-192       | 5250 | 4698 | 1.63 | 9067  | 5579 |
| DP-059       | 2071 | 5618 | 1.66 | 8296  | 5011 |
| DB-040       | 2384 | 7378 | 1.65 | 10668 | 6472 |
| DB-041       | 2262 | 6727 | 1.64 | 9770  | 5946 |
| DB-046       | 2197 | 5671 | 1.65 | 8439  | 5100 |
| HK-2         | 2045 | 6244 | 1.64 | 9032  | 5501 |
| DB-044       | 2336 | 7163 | 1.65 | 10367 | 6295 |
| DB-045       | 2277 | 7378 | 1.64 | 10592 | 6441 |

|             |      |      |      |       |      |
|-------------|------|------|------|-------|------|
| BS-74       | 2533 | 9048 | 1.59 | 12650 | 7979 |
| DB-049      | 2402 | 7097 | 1.64 | 10321 | 6275 |
| BS-73       | 2488 | 8817 | 1.56 | 12272 | 7850 |
| KAS360-7-W  | 2333 | 8422 | 1.56 | 11699 | 7478 |
| HK-37       | 2422 | 7377 | 1.61 | 10589 | 6587 |
| HK-9        | 2543 | 7614 | 1.57 | 10869 | 6902 |
| DP-027      | 1386 | 3397 | 1.72 | 5176  | 3004 |
| HK-50       | 1683 | 5002 | 1.62 | 7229  | 4458 |
| DP-183      | 4581 | 4756 | 1.63 | 8730  | 5363 |
| DP-184      | 8435 | 4400 | 1.59 | 10591 | 6644 |
| DP-028      | 2593 | 7520 | 1.61 | 10874 | 6759 |
| DP-029      | 2864 | 6182 | 1.62 | 9414  | 5814 |
| DB-051      | 2274 | 6863 | 1.67 | 10018 | 5982 |
| DB-050      | 2098 | 6211 | 1.67 | 9077  | 5443 |
| DB-054      | 2529 | 7318 | 1.64 | 10658 | 6507 |
| DB-056      | 2586 | 7329 | 1.65 | 10730 | 6514 |
| DB-059      | 2942 | 8197 | 1.61 | 11927 | 7409 |
| BS-63       | 2052 | 6750 | 1.65 | 9683  | 5869 |
| HK-13       | 2316 | 7649 | 1.58 | 10786 | 6828 |
| HK-45       | 1662 | 4579 | 1.67 | 6769  | 4051 |
| HK-44       | 1827 | 5349 | 1.67 | 7830  | 4695 |
| HK-47       | 889  | 2370 | 1.76 | 3587  | 2042 |
| DP-111      | 2411 | 6744 | 1.61 | 9805  | 6094 |
| HK-41       | 1423 | 4272 | 1.65 | 6207  | 3760 |
| DP-117      | 2254 | 5437 | 1.68 | 8224  | 4904 |
| DP-114      | 2548 | 6970 | 1.59 | 10134 | 6354 |
| HK-42       | 5166 | 3420 | 1.62 | 7426  | 4580 |
| HK-49       | 1891 | 5980 | 1.6  | 8520  | 5331 |
| DB-064      | 1998 | 5445 | 1.68 | 8076  | 4812 |
| DB-065      | 2817 | 7480 | 1.64 | 11050 | 6727 |
| 94Seori     | 2183 | 6974 | 1.58 | 9886  | 6245 |
| DB-067      | 2882 | 7279 | 1.69 | 10947 | 6493 |
| DB-060      | 2618 | 6697 | 1.66 | 9988  | 6024 |
| DB-061      | 2412 | 7172 | 1.63 | 10375 | 6381 |
| DB-062      | 2677 | 6105 | 1.64 | 9248  | 5639 |
| DB-063      | 2863 | 7364 | 1.62 | 10886 | 6705 |
| DB-068      | 2502 | 6456 | 1.67 | 9631  | 5783 |
| KAS523-7-Ru | 2414 | 7928 | 1.61 | 11258 | 7012 |
| HK25-78     | 3328 | 4554 | 1.62 | 7696  | 4740 |
| HK-30       | 1023 | 2827 | 1.75 | 4250  | 2427 |
| HK-31       | 1416 | 3889 | 1.66 | 5738  | 3456 |

|          |       |      |      |       |      |
|----------|-------|------|------|-------|------|
| HK-32    | 0     | 11   | 2.67 | 16    | 6    |
| HK-33    | 2382  | 7631 | 1.59 | 10825 | 6819 |
| HK-34    | 2361  | 7516 | 1.58 | 10642 | 6751 |
| HK-36    | 1710  | 4693 | 1.61 | 6848  | 4248 |
| DP-106   | 10178 | 3293 | 1.59 | 10288 | 6476 |
| HK-38    | 2279  | 7557 | 1.57 | 10630 | 6763 |
| HK-39    | 2132  | 6539 | 1.59 | 9334  | 5876 |
| DaePung  | 1758  | 4550 | 1.66 | 6775  | 4083 |
| DB-079   | 1399  | 3243 | 1.68 | 4941  | 2944 |
| DB-016   | 2019  | 5373 | 1.62 | 7896  | 4869 |
| HK-25    | 2323  | 7497 | 1.58 | 10596 | 6721 |
| DB-073   | 1074  | 2428 | 1.81 | 3821  | 2109 |
| DB-072   | 1967  | 4345 | 1.63 | 6604  | 4053 |
| DB-076   | 2734  | 7375 | 1.59 | 10722 | 6762 |
| DB-075   | 3     | 18   | 2.25 | 27    | 12   |
| DB-074   | 1106  | 2367 | 1.75 | 3713  | 2127 |
| PD-D03   | 4838  | 7051 | 1.61 | 11675 | 7265 |
| PD-D02   | 2823  | 8154 | 1.6  | 11780 | 7351 |
| PD-D01   | 2899  | 8495 | 1.6  | 12232 | 7657 |
| PD-D07   | 6363  | 6190 | 1.6  | 11543 | 7200 |
| PD-D06   | 1881  | 5740 | 1.62 | 8271  | 5090 |
| PD-D05   | 2445  | 8217 | 1.61 | 11645 | 7234 |
| PD-D04   | 1881  | 5534 | 1.69 | 8128  | 4821 |
| KAS523-7 | 2492  | 9097 | 1.59 | 12694 | 7992 |
| HK-23    | 7136  | 5299 | 1.58 | 10858 | 6876 |
| HK-20    | 2695  | 7145 | 1.6  | 10463 | 6522 |
| HK-27    | 2233  | 7315 | 1.61 | 10402 | 6461 |
| DP-131   | 2060  | 4475 | 1.66 | 6870  | 4140 |
| DP-132   | 2176  | 4756 | 1.67 | 7305  | 4383 |
| HK-24    | 1565  | 4271 | 1.64 | 6285  | 3822 |
| HK-29    | 1713  | 4514 | 1.67 | 6716  | 4025 |
| HK-28    | 2121  | 6727 | 1.6  | 9581  | 5994 |

---
