# Supplementary material for: Identification of Loci Governing Agronomic Traits and Mutation Hotspots via a GBS-Based Genome-Wide Association Study in a Soybean Mutant Diversity Pool
Source: MDPI journal article supplement (doi:10.3390/ijms231810441), 2022-09-09
Supplement: s1 [file s1]

Table S6. Information regarding the barcode adapters used for the GBS analysis arranged according to the population structure.

| No. | Lines        | Barcode  | No. | Lines   | Barcode  |
|-----|--------------|----------|-----|---------|----------|
| 1   | DB-003       | TCGTT    | 97  | DP-129  | GCTCTA   |
| 2   | DB-004       | GGTTGT   | 98  | DP-127  | TAGGAA   |
| 3   | DB-005       | CCAGCT   | 99  | DP-046  | ACTA     |
| 4   | DB-006       | TTCAGA   | 100 | DP-028  | CTCC     |
| 5   | KAS523-7     | CTCC     | 101 | DP-027  | TTCCTGGA |
| 6   | KAS523-7-Ru  | TGCA     | 102 | DP-012  | TATCGGGA |
| 7   | DP-179       | ATATGT   | 103 | DP-009  | GTGAGGGT |
| 8   | DP-178       | ATCGTA   | 104 | DB-090  | CCATGGGT |
| 9   | BS-25        | TCAC     | 105 | DB-092  | CGTGTGGT |
| 10  | BS-74        | TCACC    | 106 | DB-091  | CGCGGAGA |
| 11  | BS-84        | CTAGC    | 107 | DP-054  | GTAA     |
| 12  | Bangsa       | GATC     | 108 | DB-093  | GCTGTGGA |
| 13  | BS-73        | CGCTT    | 109 | DP-048  | CAGA     |
| 14  | BS-63        | TGCGA    | 110 | DP-051  | AACT     |
| 15  | JS-S         | AACT     | 111 | DP-052  | GCGT     |
| 16  | 94seori      | ACTA     | 112 | DP-053  | CGAT     |
| 17  | Joseangseori | CAGA     | 113 | DP-055  | AGGC     |
| 18  | JS-D01       | GCGT     | 114 | DP-056  | GATC     |
| 19  | JS-D02       | CGAT     | 115 | DP-060  | CGCTT    |
| 20  | HK-37        | TGGTACGT | 116 | DP-061  | TCACC    |
| 21  | PD-D01       | TTCTC    | 117 | DP-057  | TCAC     |
| 22  | PD-I06       | GGAAC    | 118 | DP-059  | TGCGA    |
| 23  | PD-I02       | ATTGA    | 119 | DP-062  | CTAGC    |
| 24  | PD-I07       | GTCAA    | 120 | Daepung | GGATTGGT |
| 25  | PD-I03       | CATCT    | 121 | DP-200  | GCCAGT   |
| 26  | PD-I04       | CCTAC    | 122 | DP-117  | GGTTGT   |
| 27  | PD-I01       | AGGAT    | 123 | DP-114  | TCGTT    |
| 28  | PD-I05       | GAGGA    | 124 | DP-111  | TACAT    |
| 29  | PD-I08-W     | TAATA    | 125 | DP-079  | ACAAA    |
| 30  | PD-D02       | AGCCC    | 126 | DP-080  | TTCTC    |
| 31  | PD-D05       | ACCGT    | 127 | DP-083  | GTATT    |
| 32  | PD-D06       | GCTTA    | 128 | DP-081  | AGCCC    |
| 33  | PD-D04       | CTGTA    | 129 | DP-084  | CTGTA    |
| 34  | PD-D07       | GGTGT    | 130 | DP-085  | ACCGT    |
| 35  | PD-D03       | GTATT    | 131 | DP-086  | GCTTA    |
| 36  | Paldal       | ACAAA    | 132 | DP-097  | GTCAA    |
| 37  | KAS360-22-W  | GTAA     | 133 | DP-090  | AGGAT    |
| 38  | KAS360-22    | AGGC     | 134 | DP-091  | ATTGA    |
| 39  | HK-32        | ACGACTAC | 135 | DP-120  | CCAGCT   |
| 40  | HK-1         | GTACTT   | 136 | DP-121  | TTCAGA   |
| 41  | HK-11        | GAACTTC  | 137 | DP-140  | GAGATA   |
| 42  | HK-14        | AACGCCT  | 138 | DB-051  | GTCGATT  |
| 43  | HK-33        | TAGCATGC | 139 | DB-050  | GGACCTA  |
| 44  | HK-38        | TCTCAGTC | 140 | DB-049  | GAACTTC  |
| 45  | HK-27        | GCGGAAT  | 141 | DB-046  | GAATTCA  |
| 46  | HK-25        | CTACGGA  | 142 | DB-045  | AAAAGTT  |

|    |           |          |     |         |          |
|----|-----------|----------|-----|---------|----------|
| 47 | HK-34     | TAGGCCAT | 143 | DB-044  | ATGAAAC  |
| 48 | HK-9      | AAAAGTT  | 144 | DB-041  | CTTGCTT  |
| 49 | HK-18     | ATTAATT  | 145 | DB-040  | TATTTTT  |
| 50 | HK-40     | CGCCTTAT | 146 | DB-037  | GTTGAA   |
| 51 | HK-39     | CCGGATAT | 147 | DB-039  | TGGCTA   |
| 52 | HK-49     | GGATTGGT | 148 | DB-038  | TAACGA   |
| 53 | HK-13     | GTCGATT  | 149 | DB-036  | GTACTT   |
| 54 | HK-19     | ATTGGAT  | 150 | DB-064  | CGGTAGA  |
| 55 | HK-28     | TAGCGGA  | 151 | DB-063  | CGCTGAT  |
| 56 | HK-3      | TAACGA   | 152 | DB-062  | CATAAGT  |
| 57 | HK-20     | CATAAGT  | 153 | DB-061  | ATTGGAT  |
| 58 | HK-2      | GTTGAA   | 154 | DB-060  | ATTAATT  |
| 59 | HK-44     | CCATGGGT | 155 | Danbaek | TACAT    |
| 60 | HK-50     | GTGAGGGT | 156 | DB-085  | CCGGATAT |
| 61 | HK-41     | AACCGAGA | 157 | DB-056  | AATATGC  |
| 62 | HK-45     | CGCGGAGA | 158 | DB-054  | AACGCCT  |
| 63 | HK-36     | TGCAAGGA | 159 | DB-027  | ATATGT   |
| 64 | HK-29     | TCGAAGA  | 160 | DB-026  | ACCTAA   |
| 65 | HK-24     | CGGTAGA  | 161 | DB-010  | CTTCCA   |
| 66 | HK-43     | ACGTGGTA | 162 | DB-035  | GGAAGA   |
| 67 | HK-31     | TGCTGGA  | 163 | DB-030  | CATCGT   |
| 68 | HK-30     | TCTGTGA  | 164 | DB-029  | ATCGTA   |
| 69 | HK-10     | GAATTCA  | 165 | DB-031  | CGCGGT   |
| 70 | HK-47     | GCTGTGGA | 166 | DB-034  | GCCAGT   |
| 71 | HK-25-78  | TATCGGGA | 167 | DB-033  | CTATTA   |
| 72 | Hwangkeum | GGAAGA   | 168 | DB-019  | ATGCCT   |
| 73 | HK-4      | TGGCTA   | 169 | DB-008  | GCTCTA   |
| 74 | HK-42     | ACAGGGAA | 170 | DB-024  | AGTGGA   |
| 75 | HK-12     | GGACCTA  | 171 | DB-009  | CCACAA   |
| 76 | HK-17     | ACGTGTT  | 172 | DB-016  | GAGATA   |
| 77 | HK-6      | CTTGCTT  | 173 | DB-007  | TAGGAA   |
| 78 | HK-46     | CGTGTGGT | 174 | DB-065  | CTACGGA  |
| 79 | HK-5      | TATTTTT  | 175 | DB-068  | TAGCGGA  |
| 80 | HK-23     | CGCTGAT  | 176 | DB-067  | GCGGAAT  |
| 81 | HK-8      | ATGAAAC  | 177 | DP-106  | TAATA    |
| 82 | HK-15     | AATATGC  | 178 | DB-072  | TCGAAGA  |
| 83 | HK-25-165 | TTCCTGGA | 179 | DB-073  | TCTGTGA  |
| 84 | DP-192    | CTATTA   | 180 | DB-074  | TGCTGGA  |
| 85 | DP-190    | CGCGGT   | 181 | DB-076  | TAGCATGC |
| 86 | DP-184    | CATCGT   | 182 | DB-078  | TAGGCCAT |
| 87 | DP-087    | GGTGT    | 183 | DB-080  | TGGTACGT |
| 88 | DP-092    | CATCT    | 184 | DB-075  | ACGACTAC |
| 89 | DP-093    | CCTAC    | 185 | DB-083  | TCTCAGTC |
| 90 | DP-094    | GAGGA    | 186 | DB-079  | TGCAAGGA |
| 91 | DP-095    | GGAAC    | 187 | DB-086  | CGCCTTAT |
| 92 | DP-152    | ATGCCT   | 188 | DB-087  | AACCGAGA |
| 93 | DP-029    | TGCA     | 189 | DB-089  | ACGTGGTA |
| 94 | DP-183    | ATCGTA   | 190 | DB-088  | ACAGGGAA |
| 95 | DP-132    | CTTCCA   | 191 | DP-172  | AGTGGA   |
| 6  | DP-131    | CCACAA   | 192 | DB-059  | ACGTGTT  |

---
