# Supplementary material for: Identification of Loci Governing Agronomic Traits and Mutation Hotspots via a GBS-Based Genome-Wide Association Study in a Soybean Mutant Diversity Pool
Source: MDPI journal article supplement (doi:10.3390/ijms231810441), 2022-09-09
Supplement: s1 [file s1]

Table S3. Variant calling for the mapped reads.

| Lines    | Progressed Reads | Mapped Reads |        | Lines  | Progressed Reads | Mapped Reads |        |
|----------|------------------|--------------|--------|--------|------------------|--------------|--------|
| KAS523-7 | 7,649,550        | 7,317,569    | 95.66% | DP-028 | 10,441,632       | 10,233,725   | 98.01% |
| 94Seori  | 3,903,690        | 3,706,390    | 94.95% | DP-029 | 3,899,686        | 3,716,598    | 95.31% |
| BS-25    | 7,547,426        | 7,301,067    | 96.74% | DP-046 | 4,114,452        | 3,860,853    | 93.84% |
| BS-63    | 3,275,656        | 3,153,291    | 96.26% | DP-048 | 1,948,254        | 1,860,717    | 95.51% |
| BS-73    | 6,821,852        | 6,674,374    | 97.84% | DP-051 | 7,443,956        | 7,202,406    | 96.76% |
| BS-74    | 9,307,644        | 9,145,850    | 98.26% | DP-052 | 7,406,186        | 7,167,732    | 96.78% |
| BS-84    | 8,899,140        | 8,605,623    | 96.70% | DP-053 | 7,231,542        | 6,772,244    | 93.65% |
| BangSa   | 10,288,844       | 7,836,341    | 76.16% | DP-054 | 4,196,558        | 3,984,055    | 94.94% |
| DanBaek  | 6,642,424        | 6,306,001    | 94.94% | DP-055 | 9,988,236        | 9,690,380    | 97.02% |
| DB-003   | 8,963,300        | 8,660,583    | 96.62% | DP-056 | 9,310,106        | 8,978,557    | 96.44% |
| DB-004   | 7,623,078        | 7,384,225    | 96.87% | DP-057 | 9,590,708        | 9,359,069    | 97.58% |
| DB-005   | 6,924,202        | 6,715,125    | 96.98% | DP-059 | 3,339,232        | 3,239,472    | 97.01% |
| DB-006   | 3,355,652        | 3,109,835    | 92.67% | DP-060 | 8,054,884        | 7,603,362    | 94.39% |
| DB-007   | 3,122,512        | 2,987,735    | 95.68% | DP-061 | 10,272,800       | 10,091,983   | 98.24% |
| DB-008   | 3,910,016        | 3,804,717    | 97.31% | DP-062 | 6,963,660        | 6,728,068    | 96.62% |
| DB-009   | 5,010,838        | 4,760,020    | 94.99% | DP-079 | 6,195,362        | 6,033,920    | 97.39% |
| DB-010   | 3,952,226        | 3,871,036    | 97.95% | DP-080 | 8,634,364        | 8,454,757    | 97.92% |
| DB-016   | 2,779,016        | 2,660,020    | 95.72% | DP-081 | 11,155,920       | 10,408,673   | 93.30% |
| DB-019   | 6,737,314        | 6,560,857    | 97.38% | DP-083 | 9,085,478        | 8,883,045    | 97.77% |
| DB-024   | 2,181,262        | 2,072,247    | 95.00% | DP-084 | 2,361,404        | 2,284,848    | 96.76% |
| DB-026   | 2,780,794        | 2,723,714    | 97.95% | DP-085 | 7,718,404        | 7,421,990    | 96.16% |
| DB-027   | 5,208,832        | 5,057,077    | 97.09% | DP-086 | 3,599,386        | 3,473,676    | 96.51% |
| DB-029   | 3,713,012        | 3,494,943    | 94.13% | DP-087 | 5,658,186        | 5,468,375    | 96.65% |
| DB-030   | 5,710,576        | 5,559,493    | 97.35% | DP-090 | 3,932,926        | 3,815,963    | 97.03% |
| DB-031   | 5,959,672        | 5,752,698    | 96.53% | DP-091 | 2,923,242        | 2,876,842    | 98.41% |
| DB-033   | 2,570,600        | 2,487,807    | 96.78% | DP-092 | 8,248,144        | 8,132,299    | 98.60% |
| DB-034   | 4,334,532        | 4,174,175    | 96.30% | DP-093 | 9,040,980        | 8,438,988    | 93.34% |
| DB-035   | 1,377,770        | 1,341,240    | 97.35% | DP-094 | 2,897,298        | 2,806,311    | 96.86% |
| DB-036   | 3,831,858        | 3,753,684    | 97.96% | DP-095 | 8,236,086        | 7,903,090    | 95.96% |
| DB-037   | 2,058,634        | 2,011,489    | 97.71% | DP-097 | 2,900,834        | 2,859,539    | 98.58% |
| DB-038   | 2,429,596        | 2,355,853    | 96.96% | DP-106 | 4,731,178        | 4,561,792    | 96.42% |

|        |           |           |        |          |            |            |        |
|--------|-----------|-----------|--------|----------|------------|------------|--------|
| DB-039 | 2,631,398 | 2,587,594 | 98.34% | DP-111   | 6,318,296  | 6,113,982  | 96.77% |
| DB-040 | 6,503,692 | 6,124,222 | 94.17% | DP-114   | 8,550,804  | 8,357,630  | 97.74% |
| DB-041 | 4,609,410 | 4,461,350 | 96.79% | DP-117   | 3,814,786  | 3,623,279  | 94.98% |
| DB-044 | 5,930,368 | 5,831,911 | 98.34% | DP-120   | 6,507,376  | 6,374,922  | 97.96% |
| DB-045 | 6,666,282 | 6,477,628 | 97.17% | DP-121   | 1,645,238  | 1,533,453  | 93.21% |
| DB-046 | 3,720,432 | 3,567,407 | 95.89% | DP-127   | 2,063,314  | 1,944,895  | 94.26% |
| DB-049 | 6,849,680 | 6,455,146 | 94.24% | DP-129   | 1,852,330  | 1,714,575  | 92.56% |
| DB-050 | 4,104,760 | 3,735,377 | 91.00% | DP-131   | 2,762,026  | 2,638,644  | 95.53% |
| DB-051 | 6,283,082 | 5,585,079 | 88.89% | DP-132   | 2,793,136  | 2,674,008  | 95.73% |
| DB-054 | 6,017,742 | 5,863,382 | 97.43% | DP-140   | 3,519,294  | 3,435,333  | 97.61% |
| DB-056 | 5,394,972 | 5,292,329 | 98.10% | DP-152   | 6,625,840  | 6,510,010  | 98.25% |
| DB-059 | 6,081,320 | 5,723,386 | 94.11% | DP-172   | 2,153,298  | 2,119,486  | 98.43% |
| DB-060 | 4,142,840 | 4,034,425 | 97.38% | DP-178   | 3,249,752  | 3,172,538  | 97.62% |
| DB-061 | 4,284,184 | 4,210,590 | 98.28% | DP-179   | 5,295,250  | 5,027,228  | 94.94% |
| DB-062 | 3,300,622 | 3,201,380 | 96.99% | DP-183   | 4,118,472  | 3,986,715  | 96.80% |
| DB-063 | 4,644,350 | 4,577,358 | 98.56% | DP-184   | 8,012,342  | 7,756,450  | 96.81% |
| DB-064 | 2,715,172 | 2,550,497 | 93.94% | DP-190   | 6,614,588  | 6,354,026  | 96.06% |
| DB-065 | 4,675,970 | 4,597,399 | 98.32% | DP-192   | 4,175,284  | 4,041,834  | 96.80% |
| DB-067 | 5,012,164 | 4,756,404 | 94.90% | DP-200   | 5,961,044  | 5,753,820  | 96.52% |
| DB-068 | 3,517,866 | 3,377,277 | 96.00% | HK-10    | 4,334,910  | 4,159,108  | 95.94% |
| DB-072 | 2,159,018 | 2,106,532 | 97.57% | HK-11    | 7,343,738  | 7,206,664  | 98.13% |
| DB-073 | 1,291,784 | 1,260,184 | 97.55% | HK-12    | 3,738,022  | 3,653,500  | 97.74% |
| DB-074 | 1,390,340 | 1,294,715 | 93.12% | HK-13    | 6,396,266  | 6,276,452  | 98.13% |
| DB-075 | 22,656    | 20,001    | 88.28% | HK-14    | 7,448,398  | 7,159,545  | 96.12% |
| DB-076 | 5,893,780 | 5,740,853 | 97.41% | HK-15    | 11,360,994 | 10,678,459 | 93.99% |
| DB-078 | 5,333,564 | 5,031,817 | 94.34% | HK-17    | 6,270,054  | 6,116,334  | 97.55% |
| DB-079 | 1,657,188 | 1,567,242 | 94.57% | HK-18    | 4,039,860  | 3,893,281  | 96.37% |
| DB-080 | 5,529,720 | 5,167,097 | 93.44% | HK-19    | 4,621,662  | 4,529,141  | 98.00% |
| DB-083 | 28,150    | 26,459    | 93.99% | HK-1     | 6,735,810  | 6,339,151  | 94.11% |
| DB-085 | 2,771,102 | 2,635,949 | 95.12% | HK-20    | 5,461,650  | 5,288,946  | 96.84% |
| DB-086 | 4,248,948 | 4,080,749 | 96.04% | HK-23    | 5,906,542  | 5,768,681  | 97.67% |
| DB-087 | 1,858,618 | 1,827,845 | 98.34% | HK-24    | 2,109,692  | 2,073,595  | 98.29% |
| DB-088 | 1,550,036 | 1,391,831 | 89.79% | HK25-165 | 2,570,908  | 2,355,098  | 91.61% |

|              |           |           |        |           |           |           |        |
|--------------|-----------|-----------|--------|-----------|-----------|-----------|--------|
| DB-089       | 1,697,242 | 1,643,407 | 96.83% | HK25-78   | 2,712,006 | 2,584,958 | 95.32% |
| DB-090       | 4,099,704 | 3,996,314 | 97.48% | HK-25     | 5,357,086 | 5,217,652 | 97.40% |
| DB-091       | 1,670,114 | 1,602,795 | 95.97% | HK-27     | 4,808,426 | 4,667,993 | 97.08% |
| DB-092       | 3,542,512 | 3,455,655 | 97.55% | HK-28     | 4,217,144 | 4,156,750 | 98.57% |
| DB-093       | 1,219,316 | 1,186,058 | 97.27% | HK-29     | 2,323,074 | 2,270,949 | 97.76% |
| DaePung      | 2,596,786 | 2,522,958 | 97.16% | HK-2      | 3,576,926 | 3,421,503 | 95.65% |
| DP-009       | 2,569,880 | 2,474,907 | 96.30% | HK-30     | 1,483,822 | 1,435,432 | 96.74% |
| DP-012       | 2,223,770 | 2,118,703 | 95.28% | HK-31     | 2,073,644 | 1,996,775 | 96.29% |
| DP-027       | 1,782,038 | 1,686,344 | 94.63% | HK-32     | 13,098    | 12,317    | 94.04% |
| JS-D01       | 7,165,048 | 6,727,981 | 93.90% | HK-33     | 7,246,082 | 6,919,317 | 95.49% |
| JS-D02       | 8,628,962 | 8,401,240 | 97.36% | HK-34     | 5,859,472 | 5,568,882 | 95.04% |
| JS-S         | 7,391,774 | 7,078,040 | 95.76% | HK-36     | 2,396,952 | 2,308,766 | 96.32% |
| JoseangSeori | 1,857,636 | 1,819,037 | 97.92% | HK-37     | 5,051,594 | 4,835,064 | 95.71% |
| KAS360-22    | 5,195,146 | 5,038,048 | 96.98% | HK-38     | 6,030,682 | 5,891,383 | 97.69% |
| PD-D01       | 8,377,176 | 7,954,301 | 94.95% | HK-39     | 4,098,070 | 3,850,452 | 93.96% |
| PD-D02       | 7,260,034 | 7,006,109 | 96.50% | HK-3      | 2,942,544 | 2,798,506 | 95.10% |
| PD-D03       | 5,564,744 | 5,443,282 | 97.82% | HK-40     | 4,023,618 | 3,891,085 | 96.71% |
| PD-D04       | 2,595,514 | 2,491,578 | 96.00% | HK-41     | 2,050,964 | 1,975,878 | 96.34% |
| PD-D05       | 5,608,760 | 5,494,435 | 97.96% | HK-42     | 2,341,824 | 2,245,563 | 95.89% |
| PD-D06       | 2,788,036 | 2,740,730 | 98.30% | HK-43     | 1,973,358 | 1,930,209 | 97.81% |
| PD-D07       | 7,262,964 | 6,914,538 | 95.20% | HK-44     | 3,366,356 | 2,885,630 | 85.72% |
| PD-I01       | 4,531,986 | 4,439,799 | 97.97% | HK-45     | 2,278,130 | 2,235,395 | 98.12% |
| PD-I02       | 3,004,114 | 2,946,054 | 98.07% | HK-46     | 4,285,394 | 4,178,785 | 97.51% |
| PD-I03       | 8,214,314 | 8,097,931 | 98.58% | HK-47     | 1,267,764 | 1,240,580 | 97.86% |
| PD-I04       | 7,530,858 | 7,431,193 | 98.68% | HK-49     | 3,207,638 | 3,150,332 | 98.21% |
| PD-I05       | 4,006,582 | 3,943,296 | 98.42% | HK-4      | 3,678,100 | 3,465,298 | 94.21% |
| PD-I06       | 6,725,074 | 6,632,468 | 98.62% | HK-50     | 2,796,832 | 2,752,962 | 98.43% |
| PD-I07       | 3,605,464 | 3,474,416 | 96.37% | HK-5      | 7,742,168 | 7,283,375 | 94.07% |
| PalDal       | 6,872,236 | 6,650,131 | 96.77% | HK-6      | 6,115,882 | 5,826,048 | 95.26% |
| KAS523-7-Ru  | 4,581,976 | 4,407,956 | 96.20% | HK-8      | 5,305,742 | 5,067,657 | 95.51% |
| PD-I08-W     | 4,815,088 | 4,569,244 | 94.89% | HK-9      | 7,941,772 | 7,505,106 | 94.50% |
| KAS360-22-W  | 7,201,464 | 7,014,368 | 97.40% | HwangKeum | 1,589,458 | 1,517,084 | 95.45% |
