# Supplementary material for: Identification of Loci Governing Agronomic Traits and Mutation Hotspots via a GBS-Based Genome-Wide Association Study in a Soybean Mutant Diversity Pool
Source: MDPI journal article supplement (doi:10.3390/ijms231810441), 2022-09-09
Supplement: s1 [file s1]

Table S5. Variant annotations and predicted effects.

| SNPs (%)      | Effect / Effect Impact / Functional Class  |
|---------------|--------------------------------------------|
| 7,843 (20.80) | INTERGENIC MODIFIER                        |
| 5,048 (13.40) | INTRON MODIFIER                            |
| N/A           | CODON_CHANGE_PLUS_CODON_INSERTION MODERATE |
| N/A           | STOP_LOST HIGH                             |
| 12 (0.03)     | STOP_LOST HIGH MISSENSE                    |
| 21 (0.05)     | SPLICE_SITE_DONOR HIGH                     |
| 1,204 (3.20)  | UTR_3_PRIME MODIFIER                       |
| 5,618 (14.9)  | UPSTREAM MODIFIER                          |
| N/A           | FRAME_SHIFT HIGH                           |
| 115 (0.30)    | START_GAINED LOW                           |
| N/A           | START_LOST HIGH                            |
| 8 (0.02)      | START_LOST HIGH MISSENSE                   |
| 27 (0.07)     | SPLICE_SITE_ACCEPTOR HIGH                  |
| N/A           | CODON_CHANGE_PLUS_CODON_DELETION MODERATE  |
| N/A           | CODON_DELETION MODERATE                    |
| N/A           | STOP_GAINED HIGH                           |
| 210 (0.56)    | STOP_GAINED HIGH NONSENSE                  |
| N/A           | CODON_INSERTION MODERATE                   |
| 4,674 (12.41) | DOWNSTREAM MODIFIER                        |
| 731 (1.95)    | UTR_5_PRIME MODIFIER                       |
| N/A           | GENE_FUSION_REVERSE HIGH                   |
| 5,193 (13.79) | SYNONYMOUS_CODING LOW SILENT               |
| 6 (0.02)      | SYNONYMOUS_STOP LOW SILENT                 |
| 6,961 (18.49) | NON_SYNONYMOUS_CODING MODERATE MISSENSE    |
| 2 (0.01)      | NON_SYNONYMOUS_START LOW MISSENSE          |
| 37,673        | Total                                      |
