# Supplementary material for: Identification of Loci Governing Agronomic Traits and Mutation Hotspots via a GBS-Based Genome-Wide Association Study in a Soybean Mutant Diversity Pool
Source: MDPI journal article supplement (doi:10.3390/ijms231810441), 2022-09-09
Supplement: s1 [file s1]

Table S1. Information regarding the nucleotide sequence reads in the GBS library.

|         | Yields (bp)    | Reads       | %, of >= Q30 Bases | Mean Quality Score |
|---------|----------------|-------------|--------------------|--------------------|
| GBS_1_F | 22,642,904,978 | 224,187,178 | 91.57              | 34.89              |
| GBS_1_R | 22,642,904,978 | 224,187,178 | 91.28              | 34.88              |
| GBS_2_F | 24,860,207,569 | 246,140,669 | 89.55              | 34.47              |
| GBS_2_R | 24,860,207,569 | 246,140,669 | 88.49              | 34.37              |
| Total   | 95,006,225,094 | 940,655,694 |                    |                    |
| Mean    |                |             | 90.22              | 34.65              |
