# Supplementary material for: Identification of Loci Governing Agronomic Traits and Mutation Hotspots via a GBS-Based Genome-Wide Association Study in a Soybean Mutant Diversity Pool
Source: MDPI journal article supplement (doi:10.3390/ijms231810441), 2022-09-09
Supplement: s1 [file s1]

Table S2. Sequencing summary.

| No. | Lines        | Total read bases (bp) | Total reads | Q20 (%) | Q30 (%) |
|-----|--------------|-----------------------|-------------|---------|---------|
| 1   | KAS523-7     | 726,119,557           | 7,649,550   | 95.86   | 91.69   |
| 2   | KAS523-7-Ru  | 435,102,753           | 4,581,976   | 95.97   | 91.88   |
| 3   | 94Seori      | 370,232,500           | 3,903,690   | 95.99   | 91.93   |
| 4   | JoseangSeori | 176,410,736           | 1,857,636   | 96.18   | 92.27   |
| 5   | J-S          | 701,348,083           | 7,391,774   | 96.16   | 92.22   |
| 6   | J-D01        | 679,102,664           | 7,165,048   | 95.94   | 91.81   |
| 7   | J-D02        | 819,499,520           | 8,628,962   | 96.11   | 92.15   |
| 8   | KAS360-22    | 493,564,235           | 5,195,146   | 95.95   | 91.86   |
| 9   | KAS360-22-W  | 684,556,560           | 7,201,464   | 96.23   | 92.31   |
| 10  | BangSa       | 966,985,012           | 10,288,844  | 95.96   | 91.75   |
| 11  | BS-25        | 715,907,775           | 7,547,426   | 96.00   | 91.95   |
| 12  | BS-63        | 310,271,146           | 3,275,656   | 96.05   | 92.00   |
| 13  | BS-73        | 646,501,528           | 6,821,852   | 95.81   | 91.64   |
| 14  | BS-74        | 882,215,094           | 9,307,644   | 95.92   | 91.82   |
| 15  | BS-84        | 843,593,595           | 8,899,140   | 95.95   | 91.86   |
| 16  | PalDal       | 651,658,366           | 6,872,236   | 96.21   | 92.34   |
| 17  | PD-D01       | 793,443,985           | 8,377,176   | 95.64   | 91.28   |
| 18  | PD-D02       | 687,974,690           | 7,260,034   | 96.12   | 92.09   |
| 19  | PD-D03       | 526,273,268           | 5,564,744   | 95.93   | 91.82   |
| 20  | PD-D04       | 245,232,233           | 2,595,514   | 95.86   | 91.72   |
| 21  | PD-D05       | 531,029,455           | 5,608,760   | 96.08   | 92.07   |
| 22  | PD-D06       | 264,235,694           | 2,788,036   | 95.92   | 91.83   |
| 23  | PD-D07       | 688,202,488           | 7,262,964   | 95.85   | 91.66   |
| 24  | PD-I01       | 430,206,525           | 4,531,986   | 96.30   | 92.46   |
| 25  | PD-I02       | 284,633,528           | 3,004,114   | 96.15   | 92.19   |
| 26  | PD-I03       | 778,676,362           | 8,214,314   | 96.11   | 92.16   |
| 27  | PD-I04       | 713,289,707           | 7,530,858   | 95.88   | 91.78   |
| 28  | PD-I05       | 379,618,173           | 4,006,582   | 96.29   | 92.44   |
| 29  | PD-I06       | 636,509,846           | 6,725,074   | 96.13   | 92.19   |
| 30  | PD-I07       | 341,510,489           | 3,605,464   | 96.14   | 92.20   |
| 31  | PD-I08-W     | 455,624,438           | 4,815,088   | 95.87   | 91.70   |
| 32  | DanBaek      | 629,626,375           | 6,642,424   | 95.85   | 91.69   |
| 33  | DB-003       | 849,483,148           | 8,963,300   | 95.78   | 91.58   |
| 34  | DB-004       | 721,068,799           | 7,623,078   | 95.93   | 91.80   |
| 35  | DB-005       | 654,696,959           | 6,924,202   | 96.14   | 92.23   |
| 36  | DB-006       | 316,693,634           | 3,355,652   | 95.87   | 91.69   |
| 37  | DB-007       | 295,156,939           | 3,122,512   | 96.13   | 92.16   |
| 38  | DB-008       | 369,626,693           | 3,910,016   | 95.85   | 91.69   |

|    |        |             |           |       |       |
|----|--------|-------------|-----------|-------|-------|
| 39 | DB-009 | 473,347,593 | 5,010,838 | 96.01 | 92.00 |
| 40 | DB-010 | 374,150,266 | 3,952,226 | 95.81 | 91.63 |
| 41 | DB-016 | 263,022,010 | 2,779,016 | 96.10 | 92.12 |
| 42 | DB-019 | 637,224,785 | 6,737,314 | 96.04 | 92.00 |
| 43 | DB-024 | 206,209,693 | 2,181,262 | 96.01 | 91.93 |
| 44 | DB-026 | 263,169,518 | 2,780,794 | 96.10 | 92.14 |
| 45 | DB-027 | 492,582,468 | 5,208,832 | 96.06 | 92.02 |
| 46 | DB-029 | 350,702,093 | 3,713,012 | 95.84 | 91.66 |
| 47 | DB-030 | 540,479,813 | 5,710,576 | 96.03 | 92.03 |
| 48 | DB-031 | 564,023,166 | 5,959,672 | 95.75 | 91.49 |
| 49 | DB-033 | 243,305,777 | 2,570,600 | 95.77 | 91.56 |
| 50 | DB-034 | 409,970,543 | 4,334,532 | 96.02 | 91.97 |
| 51 | DB-035 | 130,236,862 | 1,377,770 | 96.19 | 92.28 |
| 52 | DB-036 | 362,408,800 | 3,831,858 | 95.98 | 91.93 |
| 53 | DB-037 | 194,697,139 | 2,058,634 | 96.04 | 92.01 |
| 54 | DB-038 | 229,586,415 | 2,429,596 | 95.95 | 91.85 |
| 55 | DB-039 | 249,012,384 | 2,631,398 | 95.90 | 91.77 |
| 56 | DB-040 | 614,046,624 | 6,503,692 | 95.39 | 90.80 |
| 57 | DB-041 | 435,634,186 | 4,609,410 | 95.75 | 91.52 |
| 58 | DB-044 | 560,288,475 | 5,930,368 | 96.10 | 92.11 |
| 59 | DB-045 | 629,527,106 | 6,666,282 | 96.25 | 92.40 |
| 60 | DB-046 | 350,850,783 | 3,720,432 | 96.00 | 91.96 |
| 61 | DB-049 | 645,308,789 | 6,849,680 | 96.05 | 92.02 |
| 62 | DB-050 | 385,997,699 | 4,104,760 | 96.10 | 92.11 |
| 63 | DB-051 | 592,175,833 | 6,283,082 | 96.03 | 91.98 |
| 64 | DB-054 | 568,865,252 | 6,017,742 | 96.03 | 91.97 |
| 65 | DB-056 | 510,357,858 | 5,394,972 | 95.97 | 91.87 |
| 66 | DB-059 | 574,086,191 | 6,081,320 | 95.94 | 91.87 |
| 67 | DB-060 | 390,990,164 | 4,142,840 | 96.00 | 91.91 |
| 68 | DB-061 | 404,795,142 | 4,284,184 | 96.06 | 92.03 |
| 69 | DB-062 | 311,737,629 | 3,300,622 | 96.08 | 92.11 |
| 70 | DB-063 | 439,013,118 | 4,644,350 | 95.94 | 91.88 |
| 71 | DB-064 | 256,351,843 | 2,715,172 | 95.81 | 91.62 |
| 72 | DB-065 | 442,352,683 | 4,675,970 | 95.92 | 91.78 |
| 73 | DB-067 | 473,018,538 | 5,012,164 | 95.92 | 91.81 |
| 74 | DB-068 | 332,061,389 | 3,517,866 | 95.85 | 91.63 |
| 75 | DB-072 | 204,015,302 | 2,159,018 | 96.09 | 92.12 |
| 76 | DB-073 | 122,059,534 | 1,291,784 | 95.64 | 91.32 |
| 77 | DB-074 | 130,817,825 | 1,390,340 | 95.73 | 91.42 |
| 78 | DB-075 | 2,125,912   | 22,656    | 93.06 | 87.71 |
| 79 | DB-076 | 555,443,279 | 5,893,780 | 95.88 | 91.71 |

|     |         |               |            |       |       |
|-----|---------|---------------|------------|-------|-------|
| 80  | DB-078  | 503,184,963   | 5,333,564  | 95.92 | 91.76 |
| 81  | DB-079  | 156,227,906   | 1,657,188  | 95.89 | 91.75 |
| 82  | DB-080  | 520,443,700   | 5,529,720  | 95.72 | 91.42 |
| 83  | DB-083  | 2,565,657     | 28,150     | 96.01 | 91.83 |
| 84  | DB-085  | 260,918,135   | 2,771,102  | 96.00 | 91.97 |
| 85  | DB-086  | 400,739,718   | 4,248,948  | 95.71 | 91.44 |
| 86  | DB-087  | 175,502,404   | 1,858,618  | 96.15 | 92.20 |
| 87  | DB-088  | 145,810,809   | 1,550,036  | 95.93 | 91.80 |
| 88  | DB-089  | 160,478,838   | 1,697,242  | 95.84 | 91.71 |
| 89  | DB-090  | 387,343,216   | 4,099,704  | 95.94 | 91.84 |
| 90  | DB-091  | 157,394,392   | 1,670,114  | 95.70 | 91.41 |
| 91  | DB-092  | 334,422,275   | 3,542,512  | 95.60 | 91.25 |
| 92  | DB-093  | 115,099,416   | 1,219,316  | 95.72 | 91.45 |
| 93  | DaePung | 245,020,667   | 2,596,786  | 96.01 | 91.96 |
| 94  | DP-009  | 242,448,070   | 2,569,880  | 95.86 | 91.64 |
| 95  | DP-012  | 209,435,188   | 2,223,770  | 95.74 | 91.46 |
| 96  | DP-027  | 168,470,605   | 1,782,038  | 95.58 | 91.16 |
| 97  | DP-028  | 992,894,560   | 10,441,632 | 94.76 | 89.44 |
| 98  | DP-029  | 370,434,052   | 3,899,686  | 94.82 | 89.51 |
| 99  | DP-046  | 390,270,386   | 4,114,452  | 94.88 | 89.64 |
| 100 | DP-048  | 185,041,446   | 1,948,254  | 95.09 | 89.99 |
| 101 | DP-051  | 707,207,926   | 7,443,956  | 95.13 | 90.08 |
| 102 | DP-052  | 703,387,718   | 7,406,186  | 94.77 | 89.42 |
| 103 | DP-053  | 685,711,200   | 7,231,542  | 94.96 | 89.76 |
| 104 | DP-054  | 398,353,803   | 4,196,558  | 94.78 | 89.45 |
| 105 | DP-055  | 949,574,657   | 9,988,236  | 95.13 | 90.01 |
| 106 | DP-056  | 884,152,671   | 9,310,106  | 95.08 | 89.97 |
| 107 | DP-057  | 910,485,807   | 9,590,708  | 94.97 | 89.83 |
| 108 | DP-059  | 316,686,697   | 3,339,232  | 94.89 | 89.63 |
| 109 | DP-060  | 762,602,942   | 8,054,884  | 94.56 | 89.12 |
| 110 | DP-061  | 974,181,401   | 10,272,800 | 94.87 | 89.66 |
| 111 | DP-062  | 659,134,911   | 6,963,660  | 94.93 | 89.74 |
| 112 | DP-079  | 587,698,457   | 6,195,362  | 95.22 | 90.29 |
| 113 | DP-080  | 819,196,246   | 8,634,364  | 94.53 | 89.03 |
| 114 | DP-081  | 1,056,217,121 | 11,155,920 | 95.00 | 89.74 |
| 115 | DP-083  | 861,282,059   | 9,085,478  | 94.72 | 89.35 |
| 116 | DP-084  | 223,802,293   | 2,361,404  | 94.68 | 89.34 |
| 117 | DP-085  | 731,461,863   | 7,718,404  | 94.89 | 89.65 |
| 118 | DP-086  | 341,202,047   | 3,599,386  | 94.72 | 89.37 |
| 119 | DP-087  | 536,502,924   | 5,658,186  | 94.71 | 89.34 |
| 120 | DP-090  | 373,106,353   | 3,932,926  | 95.26 | 90.29 |

|     |           |               |            |       |       |
|-----|-----------|---------------|------------|-------|-------|
| 121 | DP-091    | 277,529,291   | 2,923,242  | 95.03 | 89.89 |
| 122 | DP-092    | 782,526,762   | 8,248,144  | 95.05 | 89.98 |
| 123 | DP-093    | 855,822,774   | 9,040,980  | 94.73 | 89.40 |
| 124 | DP-094    | 274,494,907   | 2,897,298  | 95.20 | 90.17 |
| 125 | DP-095    | 779,778,877   | 8,236,086  | 94.97 | 89.78 |
| 126 | DP-097    | 275,199,979   | 2,900,834  | 95.09 | 90.04 |
| 127 | DP-106    | 448,354,394   | 4,731,178  | 94.73 | 89.38 |
| 128 | DP-111    | 599,167,688   | 6,318,296  | 94.81 | 89.55 |
| 129 | DP-114    | 811,160,285   | 8,550,804  | 94.57 | 89.18 |
| 130 | DP-117    | 358,581,180   | 3,814,786  | 94.79 | 89.39 |
| 131 | DP-120    | 615,826,172   | 6,507,376  | 95.03 | 89.95 |
| 132 | DP-121    | 154,917,321   | 1,645,238  | 94.78 | 89.41 |
| 133 | DP-127    | 193,808,425   | 2,063,314  | 95.08 | 89.90 |
| 134 | DP-129    | 174,054,348   | 1,852,330  | 94.69 | 89.26 |
| 135 | DP-131    | 259,533,335   | 2,762,026  | 95.04 | 89.91 |
| 136 | DP-132    | 262,776,634   | 2,793,136  | 94.65 | 89.19 |
| 137 | DP-140    | 333,635,289   | 3,519,294  | 95.01 | 89.89 |
| 138 | DP-152    | 627,360,681   | 6,625,840  | 94.96 | 89.78 |
| 139 | DP-172    | 203,915,901   | 2,153,298  | 94.88 | 89.62 |
| 140 | DP-178    | 307,141,558   | 3,249,752  | 95.04 | 89.93 |
| 141 | DP-179    | 499,605,950   | 5,295,250  | 94.98 | 89.76 |
| 142 | DP-183    | 389,973,923   | 4,118,472  | 94.68 | 89.32 |
| 143 | DP-184    | 759,031,850   | 8,012,342  | 94.84 | 89.61 |
| 144 | DP-190    | 626,768,006   | 6,614,588  | 94.49 | 88.93 |
| 145 | DP-192    | 396,026,387   | 4,175,284  | 94.57 | 89.14 |
| 146 | DP-200    | 563,428,161   | 5,961,044  | 94.88 | 89.63 |
| 147 | HwangKeum | 149,675,280   | 1,589,458  | 95.10 | 90.00 |
| 148 | HK-1      | 637,202,292   | 6,735,810  | 94.76 | 89.43 |
| 149 | HK-2      | 338,472,419   | 3,576,926  | 94.83 | 89.52 |
| 150 | HK-3      | 277,170,609   | 2,942,544  | 94.88 | 89.61 |
| 151 | HK-4      | 348,311,966   | 3,678,100  | 94.58 | 89.09 |
| 152 | HK-5      | 731,734,994   | 7,742,168  | 94.16 | 88.31 |
| 153 | HK-6      | 573,733,843   | 6,115,882  | 94.59 | 89.10 |
| 154 | HK-8      | 498,890,770   | 5,305,742  | 95.04 | 89.86 |
| 155 | HK-9      | 750,140,677   | 7,941,772  | 95.20 | 90.20 |
| 156 | HK-10     | 409,626,589   | 4,334,910  | 94.86 | 89.63 |
| 157 | HK-11     | 693,108,784   | 7,343,738  | 95.01 | 89.88 |
| 158 | HK-12     | 352,812,210   | 3,738,022  | 95.07 | 89.98 |
| 159 | HK-13     | 604,358,812   | 6,396,266  | 95.03 | 89.92 |
| 160 | HK-14     | 704,987,253   | 7,448,398  | 94.84 | 89.56 |
| 161 | HK-15     | 1,071,310,458 | 11,360,994 | 94.80 | 89.42 |

|     |          |             |           |       |       |
|-----|----------|-------------|-----------|-------|-------|
| 162 | HK-17    | 592,091,099 | 6,270,054 | 94.81 | 89.55 |
| 163 | HK-18    | 379,454,541 | 4,039,860 | 95.04 | 89.86 |
| 164 | HK-19    | 436,134,846 | 4,621,662 | 94.95 | 89.71 |
| 165 | HK-20    | 517,027,332 | 5,461,650 | 94.95 | 89.79 |
| 166 | HK-23    | 558,860,106 | 5,906,542 | 94.70 | 89.36 |
| 167 | HK-24    | 198,827,537 | 2,109,692 | 94.69 | 89.30 |
| 168 | HK-25    | 505,677,536 | 5,357,086 | 94.71 | 89.29 |
| 169 | HK-27    | 454,286,427 | 4,808,426 | 94.76 | 89.43 |
| 170 | HK-28    | 398,781,913 | 4,217,144 | 94.68 | 89.28 |
| 171 | HK-29    | 220,104,536 | 2,323,074 | 94.93 | 89.75 |
| 172 | HK-30    | 139,967,339 | 1,483,822 | 94.45 | 88.88 |
| 173 | HK-31    | 196,051,864 | 2,073,644 | 94.47 | 88.90 |
| 174 | HK-32    | 1,232,816   | 13,098    | 88.92 | 80.39 |
| 175 | HK-33    | 683,866,305 | 7,246,082 | 94.65 | 89.20 |
| 176 | HK-34    | 553,971,293 | 5,859,472 | 94.74 | 89.37 |
| 177 | HK-36    | 225,902,308 | 2,396,952 | 94.79 | 89.48 |
| 178 | HK-37    | 475,356,731 | 5,051,594 | 94.57 | 89.04 |
| 179 | HK-38    | 568,721,717 | 6,030,682 | 94.74 | 89.41 |
| 180 | HK-39    | 386,809,131 | 4,098,070 | 94.74 | 89.41 |
| 181 | HK-40    | 378,884,554 | 4,023,618 | 94.62 | 89.18 |
| 182 | HK-41    | 192,772,543 | 2,050,964 | 95.08 | 89.93 |
| 183 | HK-42    | 221,321,662 | 2,341,824 | 94.84 | 89.55 |
| 184 | HK-43    | 186,347,434 | 1,973,358 | 94.69 | 89.36 |
| 185 | HK-44    | 313,105,671 | 3,366,356 | 94.86 | 89.45 |
| 186 | HK-45    | 215,053,426 | 2,278,130 | 94.44 | 88.87 |
| 187 | HK-46    | 404,037,648 | 4,285,394 | 94.37 | 88.74 |
| 188 | HK-47    | 119,528,116 | 1,267,764 | 94.55 | 89.06 |
| 189 | HK-49    | 302,833,966 | 3,207,638 | 94.83 | 89.56 |
| 190 | HK-50    | 264,313,179 | 2,796,832 | 94.68 | 89.25 |
| 191 | HK25-165 | 240,881,197 | 2,570,908 | 94.41 | 88.73 |
| 192 | HK25-78  | 256,345,285 | 2,712,006 | 94.57 | 89.07 |

---
